# Supplementary material for: Lemon exosome-like nanoparticles enhance stress survival of gut bacteria by RNase P-mediated specific tRNA decay
Source: PubMed Central journal article supplement — iScience. 2021 May 5;24(6):102511. doi: 10.1016/j.isci.2021.102511 (PMC8188359; doi:10.1016/j.isci.2021.102511), 2021-05-05
Supplement: mmc1.pdf [file mmc1.pdf]

## **Supplemental information**

### **Lemon exosome-like nanoparticles enhance stress survival of gut bacteria by RNase P-mediated specific tRNA decay**

**Chao Lei, Yun Teng, Liqing He, Mohammed Sayed, Jingyao Mu, Fangyi Xu, Xiangcheng Zhang, Anil Kumar, Kumaran Sundaram, Mukesh K. Sriwastva, Lifeng Zhang, Shao-yu Chen, Wenke Feng, Shuangqin Zhang, Jun Yan, Juw Won Park, Michael L. Merchant, Xiang Zhang, and Huang-Ge Zhang**

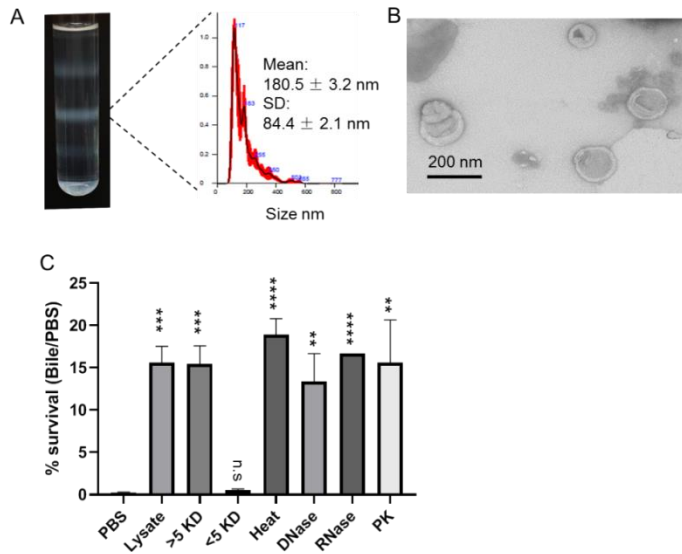

**Fig. S1 Characterization of LELNs and identification of active factors that increase the bile resistance of LGG.** (A) Size distribution of LELNs. (B) EM image of LELNs. (C) fraction and identification of LELNs effect factor, lysate indicates LELNs lysate by sonication; heat indicates heat lysate for 30 min at 80°C, >5 KD and < 5KD indicate lysate separated using a 5 KD membrane filter, DNase, RNase and PK indicate DNase I, RNase A and Protease K treatments, respectively, for 1 h at 37°C. PBS was used as a control. **Related to Fig. 1.**

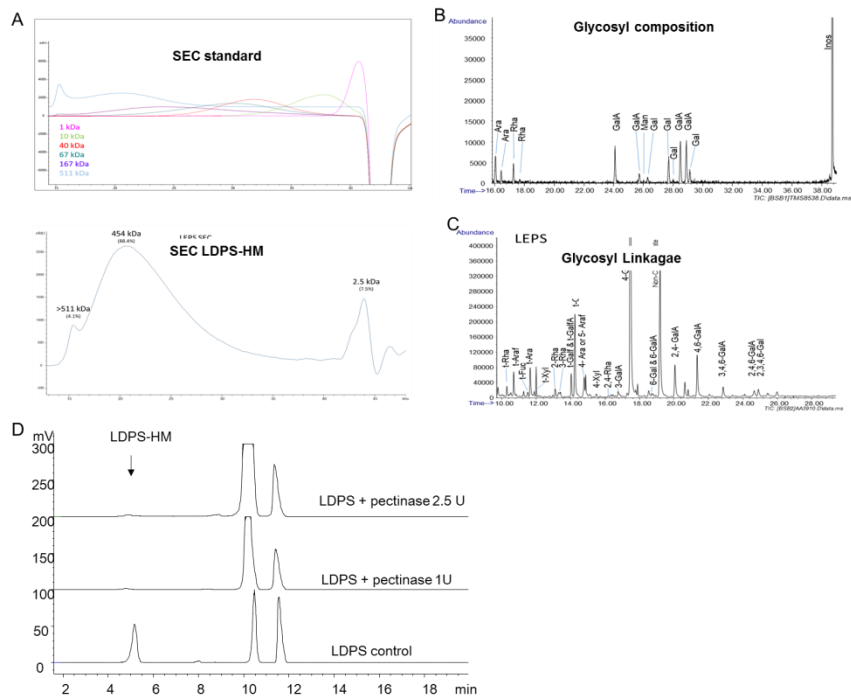

**Fig. S2 Characterization of LELNs derived pectin.** (A) Molecular weight determination, (B) Glycosyl composition and (C) Glycosyl linkage analysis of LELN derived pectin. (D) Pectinase digest test of LELN

derived pectin, reaction was performed at room temperature for 1h in acetate buffer, pH4.5. **Related to Fig. 1.**

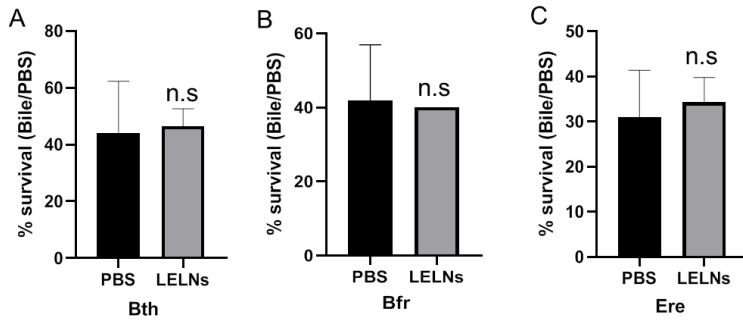

**Fig. S3 Bile resistance test of bacteroides and eubacterium strains.** Bth represents *Bacteroides thetaiotaomicron* ATCC29418, Bfr represents *Bacteroides fragilis* NCTC9343 and Ere represents *Eubacterium rectale* ATCC33656. **Related to Fig. 1.**

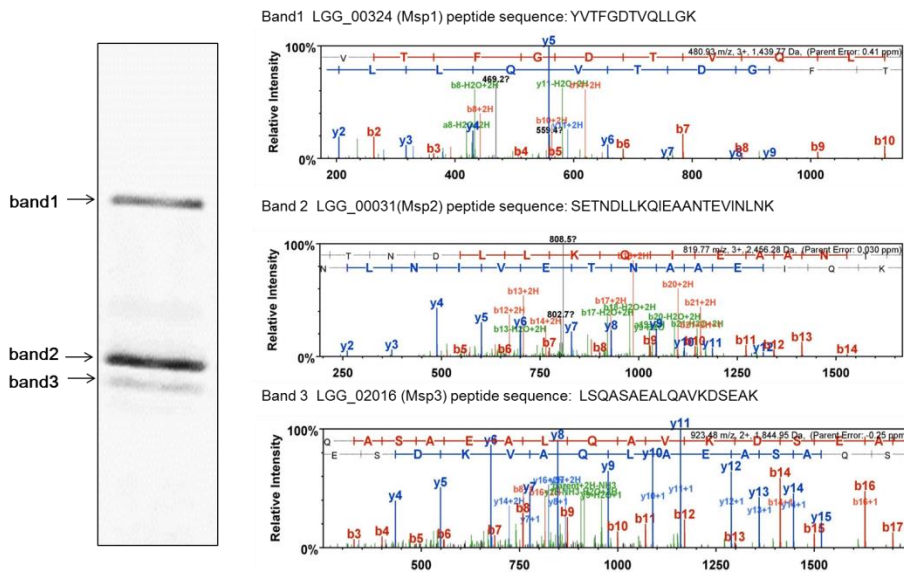

**Fig. S4 MALDI-TOF Mass confirmed major proteins in LGG culture supernatant.** **Related to Fig. 2.**

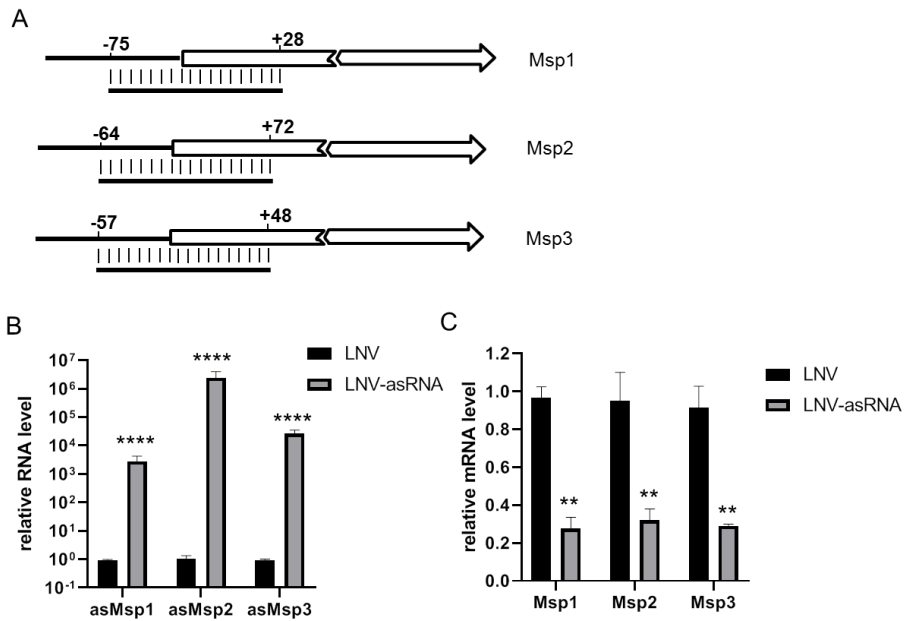

**Fig. S5 Knockdown Msp by antisense RNA.** (A) Diagram of Msp antisense RNA designs, +1 was set as the first nucleotide of the coding sequence. (B) Antisense RNA transformation efficiency. (C) qRT-PCR analysis of *msp1*, *msp2* and *msp3* mRNA levels in both LNV control and knockdown groups. Bacteria were collected at 4 h after adding antisense RNA. **Related to Fig. 2.**

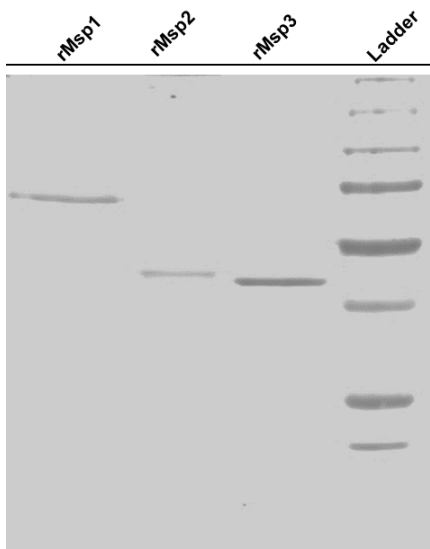

**Fig. S6 SDS-PAGE confirm to heterologous expression and purification of rMsp1, rMsp2, and rMsp3. Related to Fig. 2.**

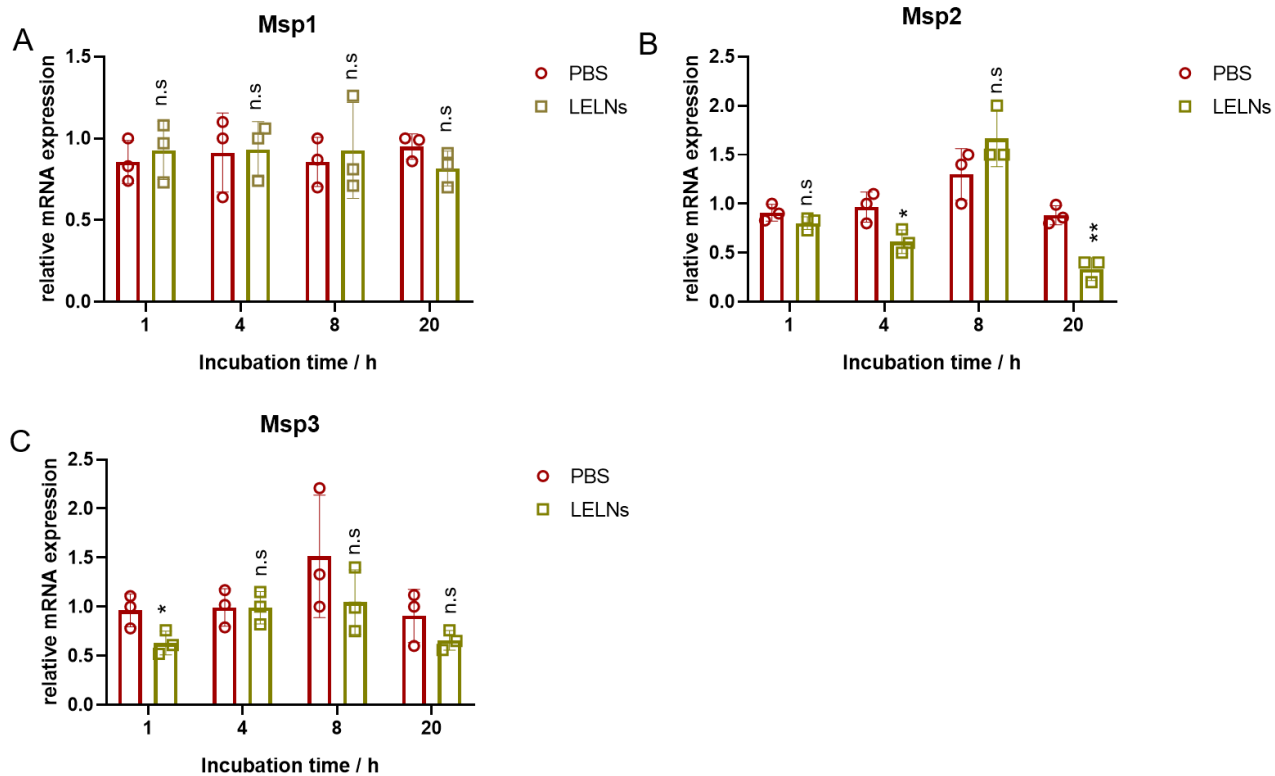

**Fig. S7 mRNA level of Msp1 (A), Msp2 (B) and Msp3 (C) with or without LELN treatment.**  $1 \times 10^{10}$  /ml LELNs were added into the LGG culture that had reached an OD600=0.6; bacteria were collected at 4 different time points as indicated after adding LELNs. **Related to Fig. 3.**

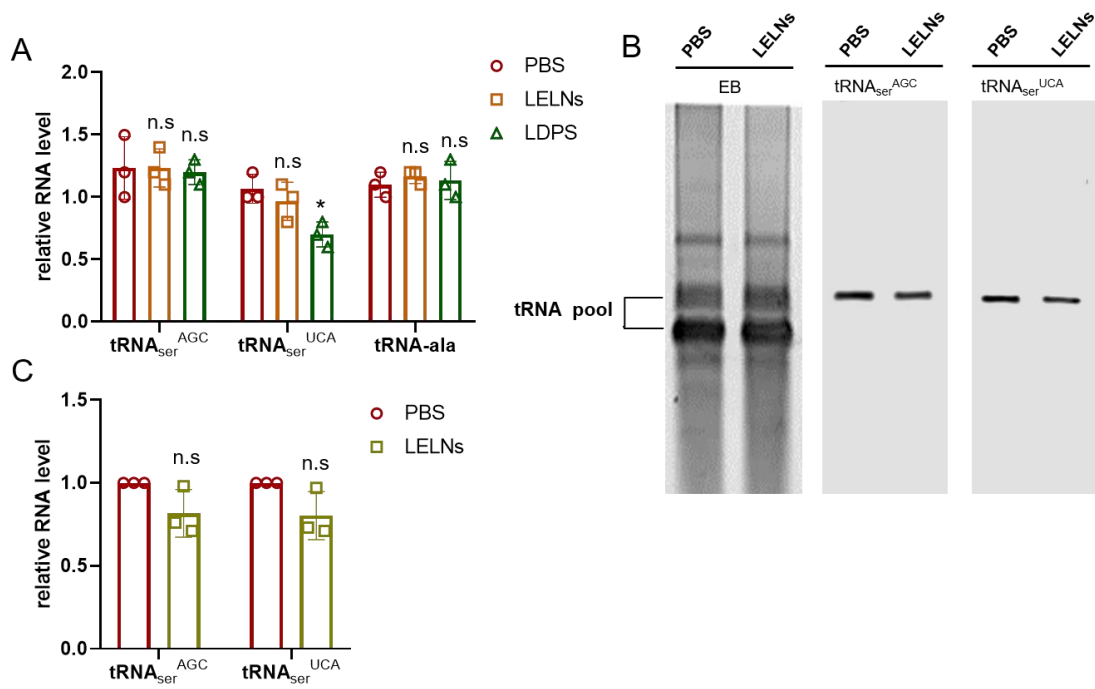

**Fig. S8 Alanine and serine tRNA levels in LGG.**  $1 \times 10^{10}$  /ml LELNs were added to LGG cultures that had reached an OD<sub>600</sub>=0.6 and cells were harvested 4 h after adding LELNs. Serine tRNA levels were detected by qRT-PCR (A) and Northern blot (B and C). **Related to Fig. 3.**



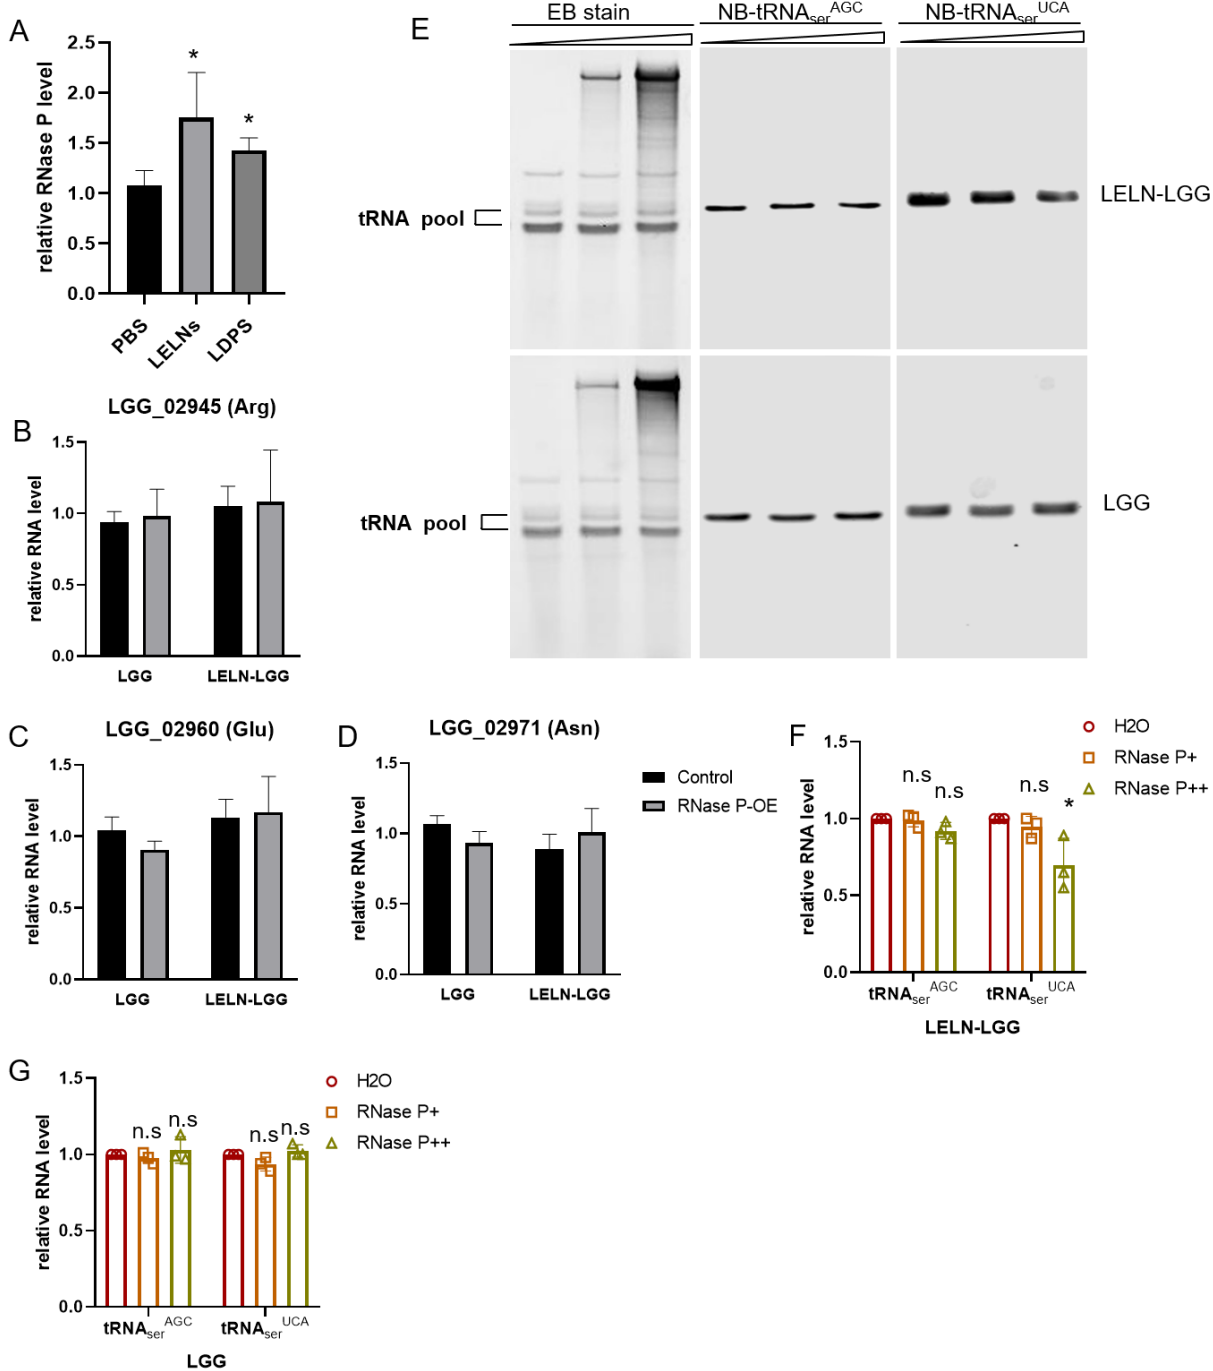

**Fig. S9** *In vitro* RNase P decay analysis of tRNA<sub>ser</sub><sup>AGC</sup> and tRNA<sub>ser</sub><sup>UCA</sup>. (A) qRT-PCR analysis of RNase P levels in LGG. 1 x 10<sup>10</sup> /ml LELNs or 10 mg/ml LDPS were added to LGG when it reached an OD<sub>600</sub>=0.6 and bacteria were harvested 4 h after treatment. (B-D) RT-PCR analyses of tRNAs as indicated in RNase overexpression and control strain. (E-G) *In-vitro* RNase P cleavage assay of

tRNA<sub>ser</sub><sup>AGC</sup> and tRNA<sub>ser</sub><sup>UCA</sup> from LGG or LELN-LGG. Two different doses of RNase P, 200 ng (middle lanes or RNase P+) and 2 µg (right lanes or RNase P++) were used in the cleavage assay. H<sub>2</sub>O treatment was used as a control (left lanes), EB stain was used as a loading control. Northern blots were quantified using Image J software. **Related to Fig. 4.**

## Tables

**Table S1 Glycosyl composition of LELNs derived pectin. Related to Fig. 1.**

| Glycosyl residue         | Mass (µg) | Mol % <sup>1</sup> |
|--------------------------|-----------|--------------------|
| Arabinose (Ara)          | 4.3       | 10.7               |
| Rhamnose (Rha)           | 1.6       | 3.7                |
| Galacturonic acid (GalA) | 38.5      | 74.4               |
| Mannose (Man)            | 0.2       | 0.4                |
| Galactose (Gal)          | 5.2       | 10.9               |
| SUM                      | 49.7      | 100.1              |

<sup>1</sup>The total Mol % may not add to exactly 100% due to rounding.

**Table S2 Glycosyl Linkage of LELNs derived pectin. Related to Fig. 1.**

| Peak                                                    | Percent area |
|---------------------------------------------------------|--------------|
| Terminal Rhamnopyranosyl residue (t-Rha)                | 1.33         |
| Terminal Arabinofuranosyl residue (t-Araf)              | 3.15         |
| Terminal Fucopyranosyl residue (t-Fuc)                  | 0.56         |
| Terminal Arabinopyranosyl residue (t-Ara)               | 4.35         |
| Terminal Xylopyranosyl residue (t-Xyl)                  | 0.78         |
| 2 linked Rhamnopyranosyl residue (2-Rha)                | 1.27         |
| 3 linked Rhamnopyranosyl residue (3-Rha)                | 0.89         |
| Terminal Galactofuranosyl residue (t-Galf)              | 0.35         |
| Terminal Galactofuranosyl uronic acid residue (t-GalfA) | 2.93         |
| Terminal Galactopyranosyl residue (t-Gal)               | 12.10        |
| Terminal Galactopyranosyl uronic acid residue (t-GalA)  | 0.77         |

|                                                                                  |            |
|----------------------------------------------------------------------------------|------------|
| 4 linked Arabinopyranosyl or 5 linked Arabinofuranosyl residue (4-Ara or 5-Araf) | 0.57       |
| 4 linked Xylopyranosyl residue (4-Xyl)                                           | 0.50       |
| 4 linked Rhamnopyranosyl residue (4-Rha)                                         | 0.21       |
| 3 linked Galactopyranosyl uronic acid residue (3-GalA)                           | 0.94       |
| 4 linked Galactopyranosyl uronic acid residue (4-GalA)                           | 57.37      |
| 6 linked Galactopyranosyl residue (6-Gal)                                        | 0.11       |
| 2,4 linked Galactopyranosyl uronic acid residue (2,4-GalA)                       | 8.35       |
| 3,4 linked Galactopyranosyl uronic acid residue (3,4-GalA)                       | 1.94       |
| 2,3,4,6 linked Galactopyranosyl residue (2,3,4,6-Gal)                            | 1.53       |
| <b>Sum</b>                                                                       | <b>100</b> |

**Table S3 Top 8 upregulated genes (red) and top 11 downregulated genes (green) due to LELNs treatment detected by MALTI-TOF MASS. Related to Fig. 2.**

| Locus     | symbol | annotation                                       | pathway                                    | serine% | alanine% |
|-----------|--------|--------------------------------------------------|--------------------------------------------|---------|----------|
| LGG_01056 | Map    | Methionine aminopeptidase                        | Peptidases                                 | 3.05    | 8.63     |
| LGG_00769 | Alars  | Conserved protein                                | unknown                                    | 2.33    | 4.65     |
| LGG_01459 | pyrB   | Aspartate carbamoyltransferase                   | Nucleotide metabolism                      | 6.07    | 8.95     |
| LGG_01603 | DnaJ   | Chaperone protein                                | Chaperones and folding catalysts           | 3.83    | 9.33     |
| LGG_02039 | RlmC   | dTDP-4-dehydrorhamnose 3,5-epimerase             | Metabolism of terpenoids and polyketides   | 3.68    | 5.79     |
| LGG_01015 | PcrA   | ATP-dependent DNA helicase                       | Replication and repair                     | 4       | 10.8     |
| LGG_02357 |        | CsbD-like superfamily protein                    | unknown, stress responding protein         | 5.8     | 11.59    |
| LGG_00856 | BsaA   | Glutathione peroxidase                           | Glutathione metabolism                     | 4.46    | 8.92     |
| LGG_00763 | YtqI   | Phosphoesterase, DHH family protein              | Energy metabolism                          | 5.35    | 11.01    |
| LGG_01171 | PrfA   | Peptide chain release factor 1                   | Translation factors                        | 5.57    | 6.13     |
| LGG_02466 | Adk    | Adenylate kinase                                 | Nucleotide metabolism                      | 1.83    | 10.55    |
| LGG_01311 | YkqC   | Metallo-beta-lactamase superfamily protein       | RNA degradation                            | 5.36    | 7.32     |
| LGG_02120 | FabH   | 3-oxoacyl-[acyl-carrier-protein] synthase III    | Fatty acid biosynthesis                    | 6.58    | 12.54    |
| LGG_01945 | OppA   | ABC transporter                                  | transporter                                | 7.91    | 7.55     |
| LGG_00208 |        | Conserved protein                                | unknown                                    | 4.77    | 10.34    |
| LGG_02255 |        | Conserved hypothetical membrane spanning protein | unknown                                    | 7.56    | 9.88     |
| LGG_00324 | Msp1   | Cell wall-associated glycoside hydrolase         | Peptidoglycan biosynthesis and degradation | 10.44   | 18.05    |
| LGG_00031 | Msp2   | Surface antigen                                  | Peptidoglycan biosynthesis and degradation | 15.63   | 15.14    |
| LGG_02016 | Msp3   | Surface antigen (NLP/P60)                        | Peptidoglycan biosynthesis and degradation | 12.78   | 24.1     |

**Table S4 Upregulated and downregulated genes due to LELNs treatment detected by RNA-seq. Related to Fig. 4.**

| Annotation                                                                              | Gene Symbol | FPKM_PBS | FPKM_LELN | Fold (LELN/PBS) |
|-----------------------------------------------------------------------------------------|-------------|----------|-----------|-----------------|
| Malolactic regulator                                                                    | LGG_RS15290 | 0        | 31.41     | #DIV/0!         |
| Malolactic regulator                                                                    | LGG_RS14165 | 0        | 63.27     | #DIV/0!         |
| ATP-dependent nuclease subunit B                                                        | LGG_RS14380 | 0        | 26.89     | #DIV/0!         |
| Malolactic regulator                                                                    | LGG_RS14965 | 0        | 49.88     | #DIV/0!         |
| Malolactic regulator                                                                    | LGG_RS15285 | 0        | 10.04     | #DIV/0!         |
| hypothetical protein                                                                    | LGG_RS14600 | 0        | 21.61     | #DIV/0!         |
| DNA methyltransferase                                                                   | LGG_RS14195 | 0        | 20.1      | #DIV/0!         |
| Malolactic regulator                                                                    | LGG_RS14955 | 0        | 14.41     | #DIV/0!         |
| acetyltransferase                                                                       | LGG_RS15040 | 0        | 18.48     | #DIV/0!         |
| hypothetical protein                                                                    | LGG_RS15390 | 0        | 14.52     | #DIV/0!         |
| hypothetical protein                                                                    | LGG_RS15240 | 3.83     | 38.12     | 9.96            |
| alpha-galactosidase                                                                     | LGG_RS15415 | 1.95     | 14.53     | 7.47            |
| hypothetical protein                                                                    | LGG_RS15420 | 2.67     | 19.92     | 7.47            |
| hypothetical protein                                                                    | LGG_RS15450 | 2.94     | 14.65     | 4.98            |
| Malolactic regulator                                                                    | LGG_RS15350 | 9.31     | 34.75     | 3.73            |
| ABC transporter ATP-binding protein                                                     | LGG_RS00165 | 6.72     | 24.23     | 3.61            |
| ATP-dependent nuclease subunit B                                                        | LGG_RS14765 | 19.26    | 65.92     | 3.42            |
| aspartate carbamoyltransferase catalytic subunit                                        | LGG_RS06995 | 112.28   | 346.22    | 3.08            |
| carbamoyl-phosphate synthase large subunit                                              | LGG_RS06980 | 117.63   | 355.09    | 3.02            |
| carbamoyl phosphate synthase small subunit                                              | LGG_RS06985 | 115.27   | 346.28    | 3               |
| dihydroorotase                                                                          | LGG_RS06990 | 102.69   | 303.67    | 2.96            |
| ABC transporter permease                                                                | LGG_RS00160 | 6.44     | 18.79     | 2.92            |
| ATP-dependent nuclease subunit B                                                        | LGG_RS14375 | 7.28     | 21.15     | 2.9             |
| orotidine-5'-phosphate decarboxylase                                                    | LGG_RS06970 | 137.87   | 375.33    | 2.72            |
| dihydroorotate dehydrogenase                                                            | LGG_RS06975 | 139.1    | 369.63    | 2.66            |
| DNA methyltransferase                                                                   | LGG_RS14915 | 8.66     | 21.56     | 2.49            |
| msp3                                                                                    | LGG_RS09710 | 85.18    | 207.76    | 2.44            |
| RNase P                                                                                 | LGG_RS14885 | 110671   | 262808    | 2.37            |
| bifunctional pyr operon transcriptional regulator/uracil phosphoribosyltransferase PyrR | LGG_RS07005 | 110.89   | 261.56    | 2.36            |
| uracil transporter                                                                      | LGG_RS07000 | 88.95    | 207.86    | 2.34            |
| hypothetical protein                                                                    | LGG_RS11175 | 45.05    | 104.37    | 2.32            |
| hypothetical protein                                                                    | LGG_RS15075 | 10.2     | 23.58     | 2.31            |
| hypothetical protein                                                                    | LGG_RS14855 | 16.01    | 36.53     | 2.28            |
| orotate phosphoribosyltransferase                                                       | LGG_RS06965 | 158.26   | 356.21    | 2.25            |
| 50S ribosomal protein L33                                                               | LGG_RS09160 | 3493.53  | 7741.48   | 2.22            |
| prevent-host-death protein                                                              | LGG_RS14285 | 243.78   | 531.04    | 2.18            |
| hypothetical protein                                                                    | LGG_RS15205 | 25.37    | 54.14     | 2.13            |
| putative holin-like toxin                                                               | LGG_RS15165 | 23.18    | 49.05     | 2.12            |
| transposase                                                                             | LGG_RS09450 | 15.56    | 32.78     | 2.11            |

| hypothetical protein                                      | LGG_RS14645 | 39.87   | 81.21   | 2.04 |
|-----------------------------------------------------------|-------------|---------|---------|------|
| XkdX family protein                                       | LGG_RS14905 | 58.32   | 29.04   | 0.5  |
| beta-hydroxyacyl-ACP dehydratase                          | LGG_RS10215 | 365.45  | 181.42  | 0.5  |
| acetyltransferase                                         | LGG_RS14980 | 290.2   | 141.35  | 0.49 |
| iron-sulfur cluster biosynthesis family protein           | LGG_RS13425 | 14458.3 | 7033.43 | 0.49 |
| hypothetical protein                                      | LGG_RS00135 | 58.67   | 28.4    | 0.48 |
| acetyltransferase                                         | LGG_RS14215 | 355.5   | 170.2   | 0.48 |
| 2-nitropropane dioxygenase                                | LGG_RS10195 | 207.24  | 97.79   | 0.47 |
| acetyltransferase                                         | LGG_RS14210 | 340.66  | 157.06  | 0.46 |
| beta-ketoacyl-[acyl-carrier-protein] synthase II          | LGG_RS10180 | 106.69  | 48.03   | 0.45 |
| acetyl-CoA carboxylase subunit beta                       | LGG_RS10160 | 205.88  | 92.42   | 0.45 |
| 3-hydroxyacyl-[acyl-carrier-protein] dehydratase FabZ     | LGG_RS10170 | 173.78  | 77.48   | 0.45 |
| histidinol-phosphate transaminase                         | LGG_RS06930 | 112.95  | 50.06   | 0.44 |
| hypothetical protein                                      | LGG_RS12910 | 58.03   | 25.13   | 0.43 |
| hypothetical protein                                      | LGG_RS14290 | 903.95  | 388.87  | 0.43 |
| ketoacyl-ACP synthase III                                 | LGG_RS10205 | 195.47  | 83.8    | 0.43 |
| TetR/AcrR family transcriptional regulator                | LGG_RS02330 | 18.24   | 7.8     | 0.43 |
| acetyl-CoA carboxylase biotin carboxylase subunit         | LGG_RS10165 | 150.11  | 63.98   | 0.43 |
| hypothetical protein                                      | LGG_RS14360 | 24.28   | 10.08   | 0.41 |
| hypothetical protein                                      | LGG_RS14790 | 19.56   | 8.12    | 0.41 |
| hypothetical protein                                      | LGG_RS14415 | 24.01   | 9.96    | 0.41 |
| CAAX protease family protein                              | LGG_RS14140 | 30.05   | 12.47   | 0.41 |
| Malolactic regulator                                      | LGG_RS15140 | 32.62   | 13.53   | 0.41 |
| acetyl-CoA carboxylase carboxyl transferase subunit alpha | LGG_RS10155 | 117.19  | 48.38   | 0.41 |
| 3-oxoacyl-ACP reductase FabG                              | LGG_RS10185 | 139.61  | 54.74   | 0.39 |
| Malolactic regulator                                      | LGG_RS14550 | 330.37  | 126.53  | 0.38 |
| ACP S-malonyltransferase                                  | LGG_RS10190 | 154.11  | 55.43   | 0.36 |
| hypothetical protein                                      | LGG_RS14680 | 25.37   | 9.02    | 0.36 |
| hypothetical protein                                      | LGG_RS14875 | 21.67   | 7.71    | 0.36 |
| hypothetical protein                                      | LGG_RS14800 | 11.57   | 4.12    | 0.36 |
| MarR family transcriptional regulator                     | LGG_RS10210 | 298.23  | 101.88  | 0.34 |
| transposase                                               | LGG_RS02175 | 22.33   | 7.58    | 0.34 |
| metal ABC transporter substrate-binding protein           | LGG_RS11595 | 705.38  | 234.5   | 0.33 |
| hypothetical protein                                      | LGG_RS15370 | 60.23   | 18.74   | 0.31 |
| ATP-dependent nuclease subunit B                          | LGG_RS15105 | 67.2    | 20.19   | 0.3  |
| hypothetical protein                                      | LGG_RS09520 | 55.41   | 16.23   | 0.29 |
| IMP cyclohydrolase                                        | LGG_RS15235 | 74.23   | 18.48   | 0.25 |
| hypothetical protein                                      | LGG_RS02085 | 14.68   | 2.15    | 0.15 |
| hypothetical protein                                      | LGG_RS14410 | 14.5    | 0       | 0    |
| Malolactic regulator                                      | LGG_RS14675 | 23.33   | 0       | 0    |
| ATP-dependent nuclease subunit B                          | LGG_RS15365 | 37.01   | 0       | 0    |
| ATP-dependent nuclease subunit B                          | LGG_RS14425 | 33.23   | 0       | 0    |

**Table S5 Primers used in this research. Related to STAR METHODS**

| Names            | Sequences                                      | Usages                                  |
|------------------|------------------------------------------------|-----------------------------------------|
| msp1-RTF         | AACATGGTATCGGCTTGCCA                           | qRT-PCR                                 |
| msp1-RTR         | GCAGCGGCAGAATCATTAGC                           | qRT-PCR                                 |
| msp2-RTF         | AGACGCTTTGGATGCGGTAA                           | qRT-PCR                                 |
| msp2-RTR         | CTTGCTTATCGCTTGGGTC                            | qRT-PCR                                 |
| msp3-RTF         | ATGGCTTAAAGGCGGATGCT                           | qRT-PCR                                 |
| msp3-RTR         | GCTAGCGGTGGAAGTAGCAA                           | qRT-PCR                                 |
| Msp1-EF          | AAAATCTATACTTCCAAGGAATGGTAGATTCTAAGAAAGTATTG   | PCR amplify for heterologous expression |
| Msp1-ER          | CTTCCTTTCGGGCTTGTATTATAGTGACGGGCGAACCGC        | PCR amplify for heterologous expression |
| Msp2-EF          | ATCATCATCACAGCAGCGGCAAATTAATAAAGCAATGATGACA    | PCR amplify for heterologous expression |
| Msp2-ER          | CTTCCTTTCGGGCTTGTATTACCGGTGGATGTAAACGTAG       | PCR amplify for heterologous expression |
| Msp3-EF          | ATCATCATCACAGCAGCGGCGAGATTAAAGCAATTGGTTACGGG   | PCR amplify for heterologous expression |
| Msp3-ER          | CTTCCTTTCGGGCTTGTATTAGAGACGACGGCCGAAGC         | PCR amplify for heterologous expression |
| PET28b-MBP-TEV-F | TAACAAAGCCCGAAAGGAAGC                          | Linearize pET28b-MBP-TEV vector         |
| PET28b-MBP-TEV-R | TCCTTGGAAGTATAGATTTTCACC                       | Linearize pET28b-MBP-TEV vector         |
| PET28b-R         | GCCGCTGCTGTGATGATGATG                          | Linearize pET28b vector                 |
| anti-msp1-F      | TAATACGACTCACTATAGGGCTGACAATACTTTCTTAGAATCTACC | in vitro transcription of antisense RNA |
| anti-msp1-R      | GAAAAGGTAAATGCAAATTAAGTG                       | in vitro transcription of antisense RNA |
| anti-msp2-F      | TAATACGACTCACTATAGGGTGTAAAGGCGCTAACAGAACCC     | in vitro transcription of antisense RNA |
| anti-msp2-R      | ATGGTGACGTAACATTGACAC                          | in vitro transcription of antisense RNA |
| anti-msp3-F      | TAATACGACTCACTATAGGGTAATGTTGCAACCGTGATGGC      | in vitro transcription of antisense RNA |
| anti-msp3-R      | ACAGTTCAGTGTTAGTGTGAACC                        | in vitro transcription of antisense RNA |
| tRNA-ala-F       | TCAGTTGGGAGAGCGCCTG                            | qRT-PCR alanine tRNA                    |
| tRNA-ala-R       | ACTTGAACCGTCGACCTCT                            | qRT-PCR alanine tRNA                    |
| SerAGC-RT-F      | ACTCAAGTGGCTGAAGAGGC                           | qRT-PCR serine tRNA                     |
| SerAGC-RT-R      | GAGGGATTTGAACCCCTCGCA                          | qRT-PCR serine tRNA                     |
| SerUCA-RT-F      | CCAAGTCTGGCTGAAGGGAA                           | qRT-PCR serine tRNA                     |
| SerUCA-RT-R      | GGATTCGAACCCCTCGCGT                            | qRT-PCR serine tRNA                     |
| SerUCC-RT-F      | GTTGTCCGAGAGGCTGAAGG                           | qRT-PCR serine tRNA                     |
| SerUCC-RT-R      | TTCGAACCCCTTGATACAGGCA                         | qRT-PCR serine tRNA                     |
| SerUCG-RT-F      | GGTATTAGCCGGTTCGACGG                           | qRT-PCR serine tRNA                     |
| SerUCG-RT-R      | GGCAGAGTGGTAATGCAACG                           | qRT-PCR serine tRNA                     |
| anti-SerAGC-F    | TAATACGACTCACTATAGGGAGAAGGAGGGATTGTAAC         | in vitro transcription of antisense RNA |
| anti-SerAGC-R    | GGAGAAGTACTCAAGTGGCTG                          | in vitro transcription of antisense RNA |
| anti-SerUCA-F    | TAATACGACTCACTATAGGGAGAATGAGGGATTGTAAC         | in vitro transcription of antisense RNA |
| anti-SerUCA-R    | GGAGAATTACCCAAGTCTGGC                          | in vitro transcription of antisense RNA |
| anti-SerUCC-F    | TAATACGACTCACTATAGGGAGAGTAAGGGATTGTAAC         | in vitro transcription of antisense RNA |

|                    |                                            |                                                |
|--------------------|--------------------------------------------|------------------------------------------------|
| anti-SerUCC-R      | AGAGTTGTCCGAGAGGCTG                        | in vitro transcription of antisense RNA        |
| anti-SerUCG-F      | TAATACGACTCACTATAGGGAGAGTACAGGATTTGAACCTGC | in vitro transcription of antisense RNA        |
| anti-SerUCG-R      | AGAGTTGGCAGAGTGTAATGC                      | in vitro transcription of antisense RNA        |
| SerAGC-p           | Bio-CAGTTTCCCGTCTACACCCTTAGCAGGGG          | Probes for northern blot                       |
| SerUCA-p           | Bio-GATTGACATCCACCTGACGGTTTTCAAGACC        | Probes for northern blot                       |
| SerUCC-p           | Bio-GGCAAACCCGTATACATGGTTTTCCAACCAT        | Probes for northern blot                       |
| SerUCG-p           | Bio-GTATTAGCCGGTTCGACGGATTTGAGTCC          | Probes for northern blot                       |
| LGG-rpoD-F         | ACAAGGCGATCAAGAAGCCA                       | qRT-PCR for LGG Quantification                 |
| LGG-rpoD-R         | CAGAAACTGCATGCCACGAC                       | qRT-PCR for LGG Quantification                 |
| Lactobacillaceae-F | AGCAGTAGGGAATCTTCCA                        | qRT-PCR for <i>in vitro</i> culture microbiota |
| Lactobacillaceae-R | CACCGCTACACATGGAG                          | qRT-PCR for <i>in vitro</i> culture microbiota |
| U-926F             | AAACTCAAAGAATTGACGG                        | qRT-PCR for <i>in vitro</i> culture microbiota |
| U-1062R            | CTCACRRACGAGCTGAC                          | qRT-PCR for <i>in vitro</i> culture microbiota |
